# Supplementary material for: Neutrophils Driving Unconventional T Cells Mediate Resistance against Murine Sarcomas and Selected Human Tumors
Source: PubMed Central journal article supplement (PMC6630709; doi:10.1016/j.cell.2019.05.047), 2019-07-11
Supplement: mmc1.pdf [file mmc1.pdf]

Cell, Volume 178

## **Supplemental Information**

### **Neutrophils Driving Unconventional T Cells Mediate Resistance against Murine Sarcomas and Selected Human Tumors**

**Andrea Ponzetta, Roberta Carriero, Silvia Carnevale, Marialuisa Barbagallo, Martina Molgora, Chiara Perucchini, Elena Magrini, Francesca Gianni, Paolo Kunderfranco, Nadia Polentarutti, Fabio Pasqualini, Sabrina Di Marco, Domenico Supino, Clelia Peano, Ferdinando Cananzi, Piergiuseppe Colombo, Silvana Pilotti, Suliman Yousef Alomar, Eduardo Bonavita, Maria Rosaria Galdiero, Cecilia Garlanda, Alberto Mantovani, and Sebastien Jaillon**

Table S1. Cytokine and chemokine levels at the 3-MCA injection site (10 days after 3-MCA administration) and in tumor homogenates, related to Figure 1 and 2.

|                               | 3-MCA injection site        |                             |               | Tumor                       |                             |               |
|-------------------------------|-----------------------------|-----------------------------|---------------|-----------------------------|-----------------------------|---------------|
|                               | (pg/mg tissue $\pm$ SEM)    |                             |               | (ng/mg tissue $\pm$ SEM)    |                             |               |
|                               | <i>Csf3r</i> <sup>+/+</sup> | <i>Csf3r</i> <sup>-/-</sup> | <i>p</i>      | <i>Csf3r</i> <sup>+/+</sup> | <i>Csf3r</i> <sup>-/-</sup> | <i>p</i>      |
| <b>IFN<math>\gamma</math></b> | 1.13 $\pm$ 0.36             | 0.272 $\pm$ 0.06            | <b>0.0447</b> | 0.11 $\pm$ 0.01             | 0.05 $\pm$ 0.01             | <b>0.0075</b> |
| <b>IL-1<math>\beta</math></b> | 54.96 $\pm$ 12.89           | 20.57 $\pm$ 5.51            | <b>0.0014</b> | 3.83 $\pm$ 0.48             | 1.56 $\pm$ 0.29             | <b>0.0007</b> |
| <b>IL-23p19</b>               | 49.99 $\pm$ 10.56           | 26.77 $\pm$ 10.27           | <b>0.0137</b> | 1.73 $\pm$ 0.36             | 0.75 $\pm$ 0.18             | <b>0.028</b>  |
| <b>M-CSF</b>                  | n.a.                        | n.a.                        |               | 0.007 $\pm$ 0.001           | 0.004 $\pm$ 0.001           | <b>0.0064</b> |
| <b>IL-22</b>                  | 17.86 $\pm$ 6.14            | 10.78 $\pm$ 4.51            | 0.6921        | 0.036 $\pm$ 0.001           | 0.008 $\pm$ 0.001           | <b>0.0159</b> |
| <b>IL-12p70</b>               | 7.52 $\pm$ 2.47             | 1.13 $\pm$ 0.27             | <b>0.0022</b> | 0.18 $\pm$ 0.02             | 0.13 $\pm$ 0.01             | 0.1072        |
| <b>CXCL1</b>                  | 89.58 $\pm$ 16.14           | 48.04 $\pm$ 8.48            | <b>0.014</b>  | 24.03 $\pm$ 4.31            | 66.31 $\pm$ 16.52           | <b>0.0291</b> |
| <b>G-CSF</b>                  | n.a.                        | n.a.                        |               | 0.33 $\pm$ 0.08             | 3.22 $\pm$ 0.72             | <b>0.0003</b> |
| <b>CXCL12</b>                 | n.a.                        | n.a.                        |               | 2.81 $\pm$ 0.42             | 7.07 $\pm$ 1.48             | <b>0.0057</b> |
| <b>VEGF</b>                   | n.a.                        | n.a.                        |               | 0.10 $\pm$ 0.01             | 0.18 $\pm$ 0.06             | 0.2179        |
| <b>TGF<math>\beta</math></b>  | n.a.                        | n.a.                        |               | 0.29 $\pm$ 0.06             | 0.32 $\pm$ 0.05             | 0.6635        |
| <b>IL-6</b>                   | 4.03 $\pm$ 1.20             | 9.89 $\pm$ 4.12             | 0.7879        | 0.25 $\pm$ 0.06             | 0.24 $\pm$ 0.06             | 0.9522        |
| <b>IL-18</b>                  | 25.49 $\pm$ 2.12            | 21.78 $\pm$ 2.9             | 0.9588        | 0.29 $\pm$ 0.05             | 0.30 $\pm$ 0.03             | 0.9588        |
| <b>CCL2</b>                   | 36.6 $\pm$ 3.80             | 29.37 $\pm$ 7.56            | 0.6313        | 23.00 $\pm$ 4.62            | 25.79 $\pm$ 3.66            | 0.6412        |
| <b>IL-17A</b>                 | 0.074 $\pm$ 0.006           | 0.994 $\pm$ 0.714           | 0.0931        | n.d.                        | n.d.                        |               |
| <b>TNF<math>\alpha</math></b> | 193.7 $\pm$ 31.2            | 109.7 $\pm$ 19.89           | <b>0.0401</b> | 0.54 $\pm$ 0.13             | 1.10 $\pm$ 0.10             | <b>0.0043</b> |
| <b>CXCL2</b>                  | 122.9 $\pm$ 24.57           | 57.33 $\pm$ 8.41            | <b>0.014</b>  |                             |                             |               |

Table S6. Genes used for Type 1 immune signature and for neutrophil-specific signature, related to Figure 7.

| <b>Human genes used for Type 1 immune signature</b> | <b>Human genes used for neutrophil signature</b> |
|-----------------------------------------------------|--------------------------------------------------|
| IFNG                                                | CSF3R                                            |
| TBX21                                               | ALPL                                             |
| STAT1                                               | BST1                                             |
| STAT4                                               | CD93                                             |
| IL12RB2                                             | CEACAM3                                          |
| SOCS1                                               | CPPED1                                           |
| SOCS2                                               | CREB5                                            |
| CCR5                                                | CRISPLD2                                         |
| CXCR3                                               | CXCR1                                            |
| CD27                                                | CXCR2                                            |
| IL18RAP                                             | CYP4F3                                           |
| IRF1                                                | DYSF                                             |
| IL12A                                               | FCAR                                             |
|                                                     | FCGR3B                                           |
|                                                     | FPR1                                             |
|                                                     | FPR2                                             |
|                                                     | G0S2                                             |
|                                                     | HIST1H2BC                                        |
|                                                     | HPSE                                             |
|                                                     | KCNJ15                                           |
|                                                     | LILRB2                                           |
|                                                     | MGAM                                             |
|                                                     | MME                                              |
|                                                     | PDE4B                                            |
|                                                     | S100A12                                          |
|                                                     | SIGLEC5                                          |
|                                                     | SLC22A4                                          |
|                                                     | SLC25A37                                         |
|                                                     | TECPR2                                           |
|                                                     | TNFRSF10C                                        |
|                                                     | VNN3                                             |

Table S7. Demographics and clinicopathologic features of patients from Humanitas Clinical and Research Center with UPS, related to Figure 7.

|                                 | <i>N</i> | Median (IQR)    |
|---------------------------------|----------|-----------------|
| <b>Age at diagnosis (years)</b> |          |                 |
| <70                             | 10       | 61 (66.5-53.25) |
| ≥70                             | 9        | 73 (78-71)      |
| <b>Gender</b>                   |          |                 |
| Male                            | 14       |                 |
| Female                          | 5        |                 |
| <b>Anatomical site</b>          |          |                 |
| Extremity                       | 8        |                 |
| Trunk                           | 10       |                 |
| Retroperitoneal                 | 1        |                 |
| <b>Grade</b>                    |          |                 |
| G3                              | 19       |                 |
